1 **Quantitative visualization of gene expression in *Pseudomonas aeruginosa* aggregates**  
2 **reveals peak expression of alginate in the hypoxic zone**

3  
4

5 Peter Jorth<sup>1,3</sup>, Melanie A. Spero<sup>1</sup>, Dianne K. Newman<sup>1,2\*</sup>

6  
7  
8

9 <sup>1</sup>Division of Biology and Biological Engineering, California Institute of Technology, Pasadena,  
10 CA, USA

11  
12 <sup>2</sup>Division of Geological and Planetary Sciences, California Institute of Technology, Pasadena,  
13 CA, USA

14  
15 <sup>3</sup>Present address: Departments of Pathology and Laboratory Medicine, Medicine, and  
16 Biomedical Sciences, Cedars-Sinai Medical Center, Los Angeles, CA, USA

17  
18  
19  
20  
21

22 **\*Address correspondence to:**

23 Dianne K. Newman  
24 Divisions of Biology and Biological Engineering and Geological and Planetary Sciences  
25 California Institute of Technology  
26 [dkn@caltech.edu](mailto:dkn@caltech.edu)

27

## 28 **Abstract**

29 It is well appreciated that oxygen- and nutrient-limiting gradients characterize  
30 microenvironments within chronic infections that foster bacterial tolerance to treatment and the  
31 immune response. However, determining how bacteria respond to these microenvironments has  
32 been limited by a lack of tools to study bacterial functions at the relevant spatial scales *in situ*.  
33 Here we report the application of the hybridization chain reaction (HCR) v3.0 to *Pseudomonas*  
34 *aeruginosa* aggregates as a step towards this end. As proof-of-principle, we visualize the  
35 expression of genes needed for the production of alginate (*algD*) and the dissimilatory nitrate  
36 reductase (*narG*). Using an inducible bacterial gene expression construct to calibrate the HCR  
37 signal, we were able to quantify *algD* and *narG* gene expression across microenvironmental  
38 gradients both within single aggregates and within aggregate populations using the Agar Block  
39 Biofilm Assay (ABBA). For the ABBA population, alginate gene expression was restricted to  
40 hypoxic regions within the environment (~40-200  $\mu\text{M O}_2$ ), as measured by an oxygen  
41 microelectrode. Within individual biofilm aggregates, cells proximal to the surface expressed  
42 alginate genes to a greater extent than interior cells. Lastly, mucoid biofilms consumed more  
43 oxygen than nonmucoid biofilms. These results establish that HCR has a sensitive dynamic  
44 range and can be used to resolve subtle differences in gene expression at spatial scales  
45 relevant to microbial assemblages. Because HCR v3.0 can be performed on diverse cell types,  
46 this methodological advance has the potential to enable quantitative studies of microbial gene  
47 expression in diverse contexts, including pathogen behavior in human chronic infections.

48 **Importance**

49 The visualization of microbial activities in natural environments is an important goal for  
50 numerous studies in microbial ecology, be the environment a sediment, soil, or infected human  
51 tissue. Here we report the application of the hybridization chain reaction (HCR) v3.0 to measure  
52 microbial gene expression *in situ* at single-cell resolution in aggregate biofilms. Using  
53 *Pseudomonas aeruginosa* with a tunable gene expression system, we show that this  
54 methodology is quantitative. Leveraging HCR v3.0 to measure gene expression within a *P.*  
55 *aeruginosa* aggregate, we find that bacteria just below the aggregate surface are the primary  
56 cells expressing genes that protect the population against antibiotics and the immune system.  
57 This observation suggests that therapies targeting bacteria growing with small amounts of  
58 oxygen may be most effective against these hard-to-treat infections. More generally, HCR v3.0  
59 has potential for broad application into microbial activities *in situ* at small spatial scales.  
60

## 61 **Observation**

62 Despite decades of research that have elucidated mechanisms of bacterial virulence, antibiotic  
63 tolerance, and antibiotic resistance, many infections remain impossible to eradicate. Phenotypic  
64 heterogeneity likely plays an important role in the failure of drugs and the immune system to  
65 clear chronic infections. Chronic *Pseudomonas aeruginosa* lung infections in people with cystic  
66 fibrosis (CF) are a prime example. Within individual lobes of the CF lung, genetically antibiotic  
67 susceptible and resistant *P. aeruginosa* co-exist (1). This likely affects treatment because  
68 resistant bacteria can protect susceptible bacteria when mixed together *in vitro* (2, 3). Likewise,  
69 CF lung mucus contains steep oxygen gradients, and anoxic conditions reduce antibiotic  
70 susceptibility (4-7). While we know that bacterial genetic diversity and infection site chemical  
71 heterogeneity exist, tools to measure bacterial phenotypes *in situ* are lacking. Here we tested  
72 the ability of the third generation of the hybridization chain reaction (HCR v3.0) to quantitatively  
73 measure gene expression in *P. aeruginosa* in an aggregate model system.

74

## 75 ***In situ* HCR v3.0 is specific and quantitative for bacterial gene expression**

76 HCR is a fluorescent *in situ* hybridization-like approach that includes a signal amplification step  
77 to help visualize low-abundant RNAs (8, 9). We previously used single HCR v2.0 probes to  
78 detect bacterial taxa in CF sputum samples (10), and HCR 2.0 was also used by Nikolakakis *et*  
79 *al.* to detect host and bacterial mRNAs in the Hawaiian bobtail squid-*Vibrio fischeri* symbiosis  
80 (11). We chose to test HCR v3.0 as a tool to quantify bacterial gene expression *in situ* because  
81 of its improved specificity over HCR v2.0. HCR v3.0 requires two paired initiator probes to  
82 anneal adjacent to one another on each RNA target before signal amplification occurs, which  
83 reduces background signal compared to HCR v2.0 non-specific binding of single initiator probes  
84 (Fig. 1A) (8, 9). Therefore, we designed and validated two types of HCR v3.0 probes which  
85 could be used to 1) differentiate species and 2) measure gene expression.

86

87 Using our previous HCR v2.0 probes as a template (10), we designed HCR v3.0 probes to  
88 detect 16S rRNA in all eubacteria and *P. aeruginosa* specifically. As expected, the  
89 *P. aeruginosa* probes detected only *P. aeruginosa* and not *Staphylococcus aureus*, while the  
90 eubacterial probe detected both organisms (Fig. 1B-C and S1). When only one initiator probe  
91 from each pair was used, no fluorescence was observed, as anticipated (Fig. S2). Thus, HCR  
92 v3.0 probes were highly specific for the intended bacteria.

93

94 To test the ability of HCR v3.0 to quantify bacterial gene expression, we designed probes to  
95 detect *P. aeruginosa algD* mRNA, and we cloned *algD* into the arabinose-inducible expression  
96 plasmid pMQ72 in a *P. aeruginosa ΔalgD* mutant (12, 13). mRNA-HCR analysis was highly  
97 quantitative: we observed a linear relationship between the concentration of the inducer (*i.e.*  
98 expression level) and HCR signal in the complemented strain, while the empty vector control  
99 strain produced no signal (Fig. 1D and S3). This demonstrated that mRNA-HCR can quantify  
100 bacterial gene expression *in situ*.

101

### 102 ***mRNA-HCR reveals alginate gene expression in hypoxic zones of P. aeruginosa*** 103 ***aggregates***

104 As a case study, we chose to measure *P. aeruginosa* alginate (*algD*) and nitrate reductase  
105 (*narG*) gene expression in aggregates formed by a mucoid (FRD1) and nonmucoid strain  
106 (PA14). This approach was chosen for several reasons. First, measuring *algD* expression *in situ*  
107 is of interest because alginate is overproduced by mucoid strains in CF lung infections (14, 15),  
108 and mucoid strains are associated with worsened lung function (16). Second, as a technical  
109 control, the *algD* gene should be more highly expressed in the mucoid than in nonmucoid strain  
110 and produce a stronger HCR signal (14). Third, previous research suggests that alginate may  
111 be expressed in hypoxic and anoxic conditions (7, 17-19), yet the precise location of alginate  
112 gene expression in aggregate biofilms has yet to be determined. Therefore, we could also

113 quantify *algD* expression relative to *narG*, a gene induced under hypoxic and anoxic conditions  
114 (17, 20), which would help determine where *algD* is expressed in aggregates relative to  
115 environmental oxygen availability.

116

117 Using the Agar Block Biofilm Assay (ABBA) (20), we grew mucoid and nonmucoid aggregates  
118 suspended in an agar medium and measured *narG* and *algD* gene expression with mRNA-  
119 HCR. As expected, the mucoid strain expressed *algD* more highly than the nonmucoid strain  
120 (Fig. 2A-C,E). Spatially, *algD* expression was highest in the zones within the first 200  $\mu\text{m}$  below  
121 the air-agar interface (Fig 2A-C,E). Interestingly, *narG* was also expressed more highly in the  
122 mucoid than nonmucoid strain (Fig 2D) and was expressed more evenly in aggregates at  
123 varying depths below the agar surface (Fig. 2A-D). Analysis of individual aggregates in the  
124 ABBA experiments showed an intriguing ring-like pattern of 16S rRNA, *algD*, and *narG* gene  
125 expression. Within individual aggregates, *algD* expression was detected in cells  $\sim$ 5-15  $\mu\text{m}$   
126 below the aggregate surface but was not detected in the innermost cells within  $\sim$ 10  $\mu\text{m}$  of the  
127 aggregate center (Fig. 2F-G). In contrast, the innermost cells highly expressed *narG*, but cells  
128 within  $\sim$ 0-10  $\mu\text{m}$  of the aggregate surface did not express *narG* (Fig. 2F-G). This led us to  
129 hypothesize that *algD* was being expressed by cells experiencing hypoxia just below the  
130 aggregate surface and not by cells in the innermost, presumably anoxic, regions of the  
131 aggregates.

132

133 To test where cells were expressing *algD* relative to oxygen availability, we used a  
134 microelectrode to measure oxygen concentrations from 0-600  $\mu\text{m}$  below the agar surface in  
135 mucoid and nonmucoid ABBA experiments. Unexpectedly, the mucoid strain showed a modest  
136 increase in its oxygen consumption rate compared to the nonmucoid strain (Fig. 2H). However,  
137 as we predicted, the mucoid strain expressed *algD* highest in hypoxic regions (5-200  $\mu\text{m}$

138 oxygen) of the agar, from 0-350  $\mu\text{m}$  below the agar surface and peaking at  $\sim 75$   $\mu\text{M}$  oxygen (Fig.  
139 2I-J). In regions with less than 5  $\mu\text{M}$  oxygen, *algD* expression plummeted to  $<1\%$  of the  
140 maximum value detected (Fig. 2I-J). This was surprising because in planktonic cultures we  
141 found that anoxia most strongly induced *algD* expression compared to oxic and hypoxic  
142 conditions (Fig. S5), similar to previous research (18). Thus, alginate gene expression patterns  
143 differ between planktonic and aggregate cells: in aggregate cells, *algD* expression is greatest  
144 under hypoxic rather than anoxic conditions.

145

## 146 **Conclusion**

147 Altogether, these experiments demonstrate the utility of HCR v3.0 for quantitatively measuring  
148 bacterial gene expression *in situ* at spatial scales relevant to microbial assemblages. Going  
149 forward, it will be exciting to combine mRNA-HCR with tissue clearing methods such as  
150 MiPACT (10) to determine whether the expression patterns observed in these *in vitro* studies  
151 similarly characterize aggregate populations of pathogens *in vivo*. Direct insight into how  
152 pathogen physiology develops in infected tissues, or any other context where spatial  
153 observation of microbial activities is important, promises to yield insights that will facilitate more  
154 effective control of these communities. Many applications of HCR v3.0 can be envisioned, such  
155 as using this visualization tool to analyze microbes after therapeutic interventions to identify  
156 bacterial subpopulations that either resist or succumb to treatment. Ultimately, identifying the  
157 subpopulations that survive a specific perturbation can be used to guide the development and  
158 implementation of future therapeutics.

159

## 160 **Methods**

161 Bacterial strains were routinely grown in Luria Bertani broth and agar. Bacterial cloning, ABBA  
162 experiments, HCR analyses, and oxygen measurements were performed as described

163 previously (10, 12, 21-25). For experimental details see Supplemental Methods and Tables

164 including probe sequences (Table S1), bacterial strains (Table S2), and primers (Table S3).

165

166

167



168 **Figures**

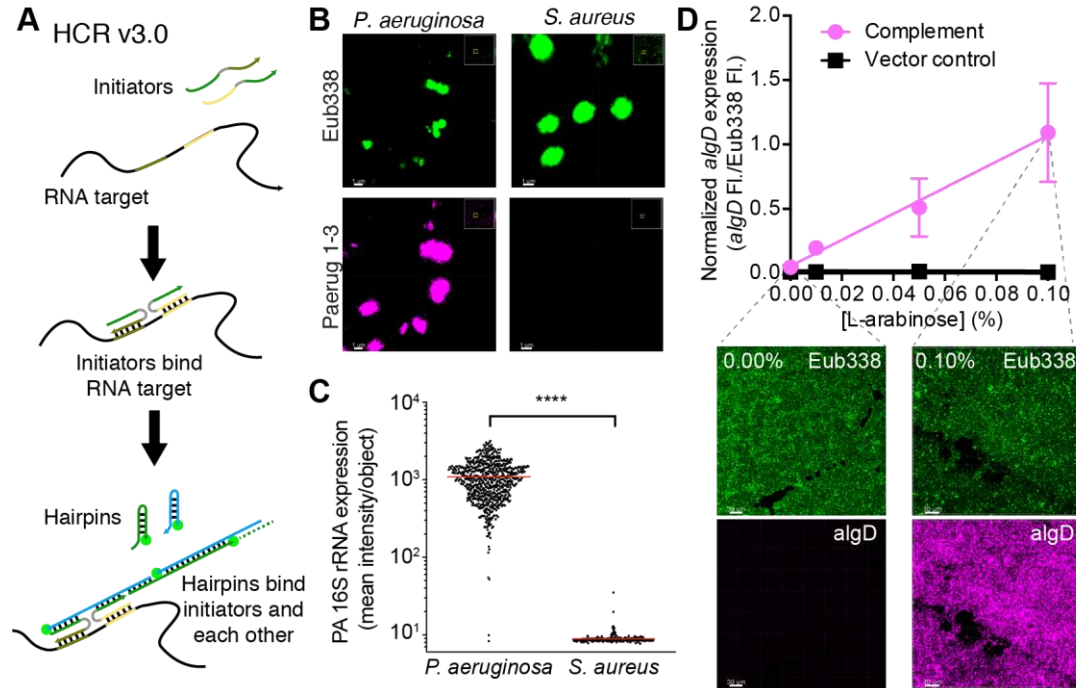

169

170 **Figure 1. HCR v3.0 analysis is specific and quantitative.** **A.** HCR v3.0 utilizes two initiator  
 171 probes that bind an RNA target followed by two hairpin probes that bind the initiators and each  
 172 other to generate an amplified fluorescent signal. **B.** HCR v3.0 probes bind to intended targets  
 173 in bacterial cells. Micrographs show that the Eub338 probe pair (green) binds both *P.*  
 174 *aeruginosa* and *S. aureus* rRNA, while the *P. aeruginosa* Paerug1-3 probe pairs mixture  
 175 (magenta) binds only *P. aeruginosa* rRNA. Scale bars indicate 1  $\mu\text{m}$ . **C.** The *P. aeruginosa*  
 176 Paerug1-3 probe pairs mixture binds more to individual *P. aeruginosa* cells than *S. aureus* cells  
 177 (red lines: mean; \*\*\*\* $p < 0.0001$ , unpaired t-test). **D.** *algD* mRNA-HCR analysis shows  
 178 fluorescence increases linearly in the PAO1  $\Delta\text{algD}$  pMQ72::*algD* strain (complement) with  
 179 increasing arabinose inducer, while the PAO1  $\Delta\text{algD}$  pMQ72 strain (vector control) shows no  
 180 induction. Representative micrographs for the complement strain with 0% and 0.10% arabinose  
 181 inducer are shown. Mean normalized fluorescence (*algD* relative to rRNA) is graphed  
 182 (complement  $n=3$  images per concentration, mean  $\pm$  SEM; vector control  $n=2$  images per  
 183 concentration, mean only). Scale 30  $\mu\text{m}$ . See also Figures S1, S2, and S3.

184

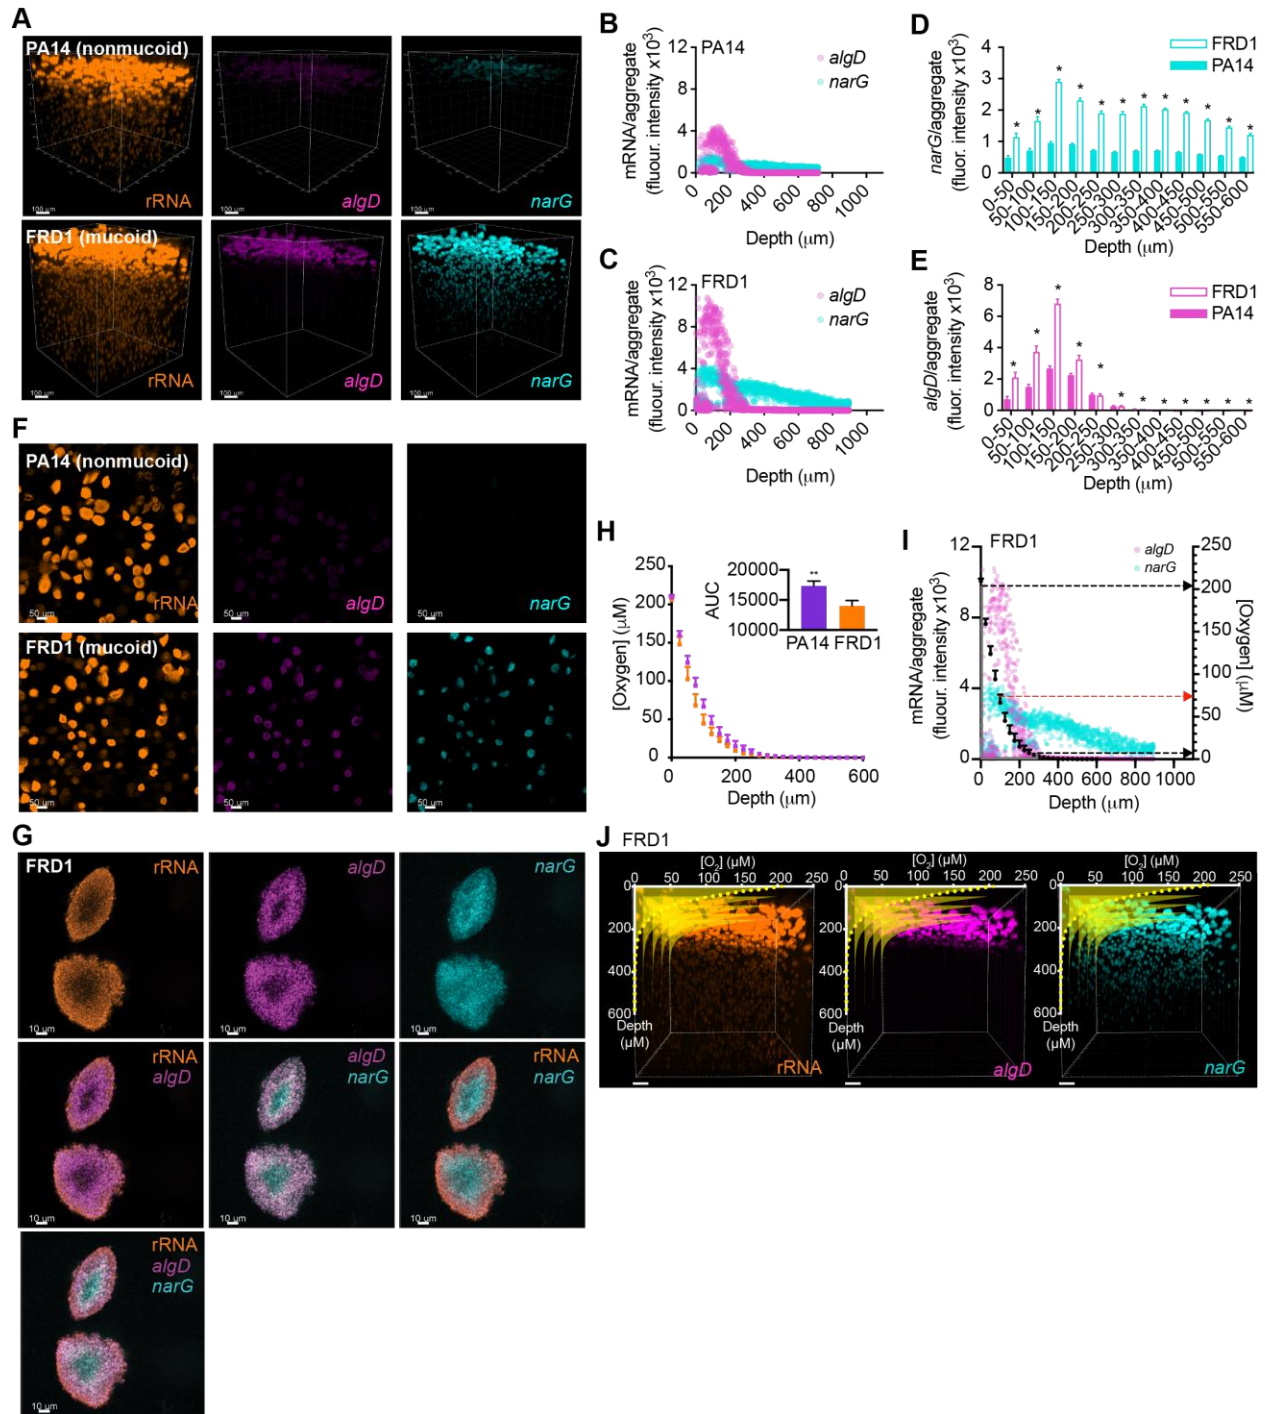

185

186 **Figure 2. Alginate gene expression is highest in hypoxic regions of *P. aeruginosa***

187 **aggregates. A.** 3D fluorescence micrographs of nonmucoid PA14 and mucoid FRD1 ABBA

188 samples probed with the Eub338 (rRNA), *algD*, and *narG* HCR v3.0 probes. Scale bars: 100

189  $\mu\text{m}$ . **B-C.** Mean *algD* and *narG* HCR signals per individual aggregate in nonmucooid (**B**) and  
190 mucooid (**C**) strains. **D-E.** Mean *algD* (**D**) and *narG* (**E**) HCR signals per ABBA aggregate biofilm  
191 at different binned depths below the air-agar interface in each sample (50  $\mu\text{m}$  bins; mean +/-  
192 SEM; \* $p < 0.05$ , unpaired two-tailed t-test; nd: not detected). **F.** 2D micrographs of nonmucooid  
193 and mucooid ABBA samples probed with the rRNA, *algD*, and *narG* HCR probes. Images  
194 correspond to single Z-slices 99  $\mu\text{m}$  below the air-agar interface. Scale bars: 50  $\mu\text{m}$ . **G.** 2D  
195 micrograph of mucooid ABBA aggregates probed with the rRNA, *algD*, and *narG* HCR probes.  
196 Overlays show that nitrate reductase is expressed by interior bacterial cells, while *algD* is  
197 expressed by bacterial cells just below the aggregate surface. Each image corresponds to the  
198 same Z-slice with different probes shown. Scale bars: 10  $\mu\text{m}$ . **H.** Oxygen profiles in nonmucooid  
199 and mucooid ABBA samples. Mean oxygen concentrations at 25  $\mu\text{m}$  intervals from the air-agar  
200 interface to 600  $\mu\text{m}$  below ( $n=3$ ) are indicated. Inset bar graph indicates area under the curve  
201 (AUC) for each scatter plot (\*\* $p < 0.005$ , unpaired two-tailed t-test). **I.** Mean *algD* and *narG*  
202 expression per mucooid ABBA aggregate (left y-axis) plotted with mean oxygen concentrations  
203 measured (right y-axis). Red arrow indicates oxygen concentration at which peak *algD*  
204 expression was detected, black arrows indicate minimum and maximum oxygen concentrations  
205 at which *algD* expression was detected. In **H&I**, error bars indicate SEM for the oxygen  
206 concentrations. **J.** Expression of *algD* is restricted to hypoxic regions, while *narG* is detected in  
207 hypoxic, and anoxic regions. Oxygen profiles (yellow) overlay 3D micrographs showing rRNA,  
208 *algD*, and *narG* HCR signals in mucooid ABBA samples. Oxygen profiles are plotted multiple  
209 times using perspective at different xz-planes along the y-axis. In **A-G,&I-J** data are shown from  
210 a representative ABBA experiment. Results from a replicate experiment are shown in Figure S4.  
211

## 212 **Acknowledgements**

213 We would like to thank Will DePas, Ruth Lee, Niles Pierce and the Programmable Molecular  
214 Technology Center at the Caltech Beckman Institute for technical assistance and advice.  
215 Confocal microscopy was performed in the Caltech Biological Imaging Facility at the Caltech  
216 Beckman Institute, which is supported by the Arnold and Mabel Beckman Foundation. Grants to  
217 DKN from the Army Research Office (W911NF-17-1-0024) and National Institutes of Health  
218 (1R01AI127850-01A1) supported this research. PJ was supported by postdoctoral fellowships  
219 from the Cystic Fibrosis Foundation (JORTH14F0 and JORTH17F5). MAS was supported by a  
220 gift from the Doren Family Foundation.  
221

## 222 References

- 223
- 224 1. **Jorth P, Staudinger BJ, Wu X, Hisert KB, Hayden H, Garudathri J, Harding CL,**  
225 **Radey MC, Rezayat A, Bautista G, Berrington WR, Goddard AF, Zheng C,**  
226 **Angermeyer A, Brittnacher MJ, Kitzman J, Shendure J, Fligner CL, Mittler J, Aitken**  
227 **ML, Manoil C, Bruce JE, Yahr TL, Singh PK.** 2015. Regional isolation drives bacterial  
228 diversification within cystic fibrosis lungs. *Cell Host Microbe* **18**:307-319.
- 229 2. **Malhotra S, Limoli DH, English AE, Parsek MR, Wozniak DJ.** 2018. Mixed  
230 communities of mucoid and nonmucoid *Pseudomonas aeruginosa* exhibit enhanced  
231 resistance to host antimicrobials. *MBio* **9**.
- 232 3. **Connell JL, Ritschdorff ET, Whiteley M, Shear JB.** 2013. 3D printing of microscopic  
233 bacterial communities. *Proc Natl Acad Sci U S A* **110**:18380-18385.
- 234 4. **Cowley ES, Kopf SH, LaRiviere A, Ziebis W, Newman DK.** 2015. Pediatric cystic  
235 fibrosis sputum can be chemically dynamic, anoxic, and extremely reduced due to  
236 hydrogen sulfide formation. *MBio* **6**:e00767.
- 237 5. **Hill D, Rose B, Pajkos A, Robinson M, Bye P, Bell S, Elkins M, Thompson B,**  
238 **Macleod C, Aaron SD, Harbour C.** 2005. Antibiotic susceptibilities of *Pseudomonas*  
239 *aeruginosa* isolates derived from patients with cystic fibrosis under aerobic, anaerobic,  
240 and biofilm conditions. *J Clin Microbiol* **43**:5085-5090.
- 241 6. **Borriello G, Werner E, Roe F, Kim AM, Ehrlich GD, Stewart PS.** 2004. Oxygen  
242 limitation contributes to antibiotic tolerance of *Pseudomonas aeruginosa* in biofilms.  
243 *Antimicrob Agents Chemother* **48**:2659-2664.
- 244 7. **Worlitzsch D, Tarran R, Ulrich M, Schwab U, Cekici A, Meyer KC, Birrer P, Bellon**  
245 **G, Berger J, Weiss T, Botzenhart K, Yankaskas JR, Randell S, Boucher RC, Doring**  
246 **G.** 2002. Effects of reduced mucus oxygen concentration in airway *Pseudomonas*  
247 infections of cystic fibrosis patients. *J Clin Invest* **109**:317-325.
- 248 8. **Choi HM, Calvert CR, Husain N, Huss D, Barsi JC, Deverman BE, Hunter RC, Kato**  
249 **M, Lee SM, Abelin AC, Rosenthal AZ, Akbari OS, Li Y, Hay BA, Sternberg PW,**  
250 **Patterson PH, Davidson EH, Mazmanian SK, Prober DA, van de Rijn M, Leadbetter**  
251 **JR, Newman DK, Readhead C, Bronner ME, Wold B, Lansford R, Sauka-Spengler**  
252 **T, Fraser SE, Pierce NA.** 2016. Mapping a multiplexed zoo of mRNA expression.  
253 *Development* **143**:3632-3637.
- 254 9. **Choi HMT, Schwarzkopf M, Fornace ME, Acharya A, Artavanis G, Stegmaier J,**  
255 **Cunha A, Pierce NA.** 2018. Third-generation in situ hybridization chain reaction:  
256 multiplexed, quantitative, sensitive, versatile, robust. *Development* **145**.
- 257 10. **DePas WH, Starwalt-Lee R, Van Sambeek L, Ravindra Kumar S, Gradinaru V,**  
258 **Newman DK.** 2016. Exposing the three-dimensional biogeography and metabolic states  
259 of pathogens in cystic fibrosis sputum via hydrogel embedding, clearing, and rRNA  
260 labeling. *MBio* **7**.
- 261 11. **Nikolakakis RM, Lehnert E, McFall-Ngai MJ, Ruby EG.** 2015. Use of Hybridization  
262 Chain Reaction-Fluorescent *in situ* Hybridization to track gene expression by both  
263 partners during initiation of symbiosis. *Appl Environ Microbiol* **81**:4728-4735.
- 264 12. **Shanks RM, Caiazza NC, Hinsa SM, Toutain CM, O'Toole GA.** 2006. *Saccharomyces*  
265 *cerevisiae*-based molecular tool kit for manipulation of genes from gram-negative  
266 bacteria. *Appl Environ Microbiol* **72**:5027-5036.
- 267 13. **Tseng BS, Zhang W, Harrison JJ, Quach TP, Song JL, Penterman J, Singh PK,**  
268 **Chopp DL, Packman AI, Parsek MR.** 2013. The extracellular matrix protects  
269 *Pseudomonas aeruginosa* biofilms by limiting the penetration of tobramycin. *Environ*  
270 *Microbiol* **15**:2865-2878.

- 271 14. **Deretic V, Gill JF, Chakrabarty AM.** 1987. Gene *algD* coding for GDPmannose  
272 dehydrogenase is transcriptionally activated in mucoid *Pseudomonas aeruginosa*. J  
273 Bacteriol **169**:351-358.
- 274 15. **Evans LR, Linker A.** 1973. Production and characterization of the slime polysaccharide  
275 of *Pseudomonas aeruginosa*. J Bacteriol **116**:915-924.
- 276 16. **Li Z, Kosorok MR, Farrell PM, Laxova A, West SE, Green CG, Collins J, Rock MJ,**  
277 **Splaingard ML.** 2005. Longitudinal development of mucoid *Pseudomonas aeruginosa*  
278 infection and lung disease progression in children with cystic fibrosis. JAMA **293**:581-  
279 588.
- 280 17. **Alvarez-Ortega C, Harwood CS.** 2007. Responses of *Pseudomonas aeruginosa* to low  
281 oxygen indicate that growth in the cystic fibrosis lung is by aerobic respiration. Mol  
282 Microbiol **65**:153-165.
- 283 18. **Hassett DJ.** 1996. Anaerobic production of alginate by *Pseudomonas aeruginosa*:  
284 alginate restricts diffusion of oxygen. J Bacteriol **178**:7322-7325.
- 285 19. **Leitao JH, Sa-Correia I.** 1993. Oxygen-dependent alginate synthesis and enzymes in  
286 *Pseudomonas aeruginosa*. J Gen Microbiol **139**:441-445.
- 287 20. **Palmer KL, Brown SA, Whiteley M.** 2007. Membrane-bound nitrate reductase is  
288 required for anaerobic growth in cystic fibrosis sputum. J Bacteriol **189**:4449-4455.
- 289 21. **Spero MA, Newman DK.** 2018. Chlorate specifically targets oxidant-starved, antibiotic-  
290 tolerant populations of *Pseudomonas aeruginosa* biofilms. MBio **9**.
- 291 22. **Smith AW, Iglewski BH.** 1989. Transformation of *Pseudomonas aeruginosa* by  
292 electroporation. Nucleic Acids Res **17**:10509.
- 293 23. **Gibson DG, Young L, Chuang RY, Venter JC, Hutchison CA, 3rd, Smith HO.** 2009.  
294 Enzymatic assembly of DNA molecules up to several hundred kilobases. Nat Methods  
295 **6**:343-345.
- 296 24. **Teal TK, Lies DP, Wold BJ, Newman DK.** 2006. Spatiometabolic stratification of  
297 *Shewanella oneidensis* biofilms. Appl Environ Microbiol **72**:7324-7330.
- 298 25. **Vogel HJ, Bonner DM.** 1956. Acetylornithinase of *Escherichia coli*: partial purification  
299 and some properties. J Biol Chem **218**:97-106.
- 300
- 301
